# Supplementary material for: Trend analysis by a piecewise linear regression model applied to surface air temperatures in Southeastern Spain (1973–2014)
Source: Copernicus journal article supplement (doi:10.5194/npg-2016-29), 2016-05-30
Supplement: Supplementary file 1 [file npg-2016-29-supplement.pdf]

1 Supplemental material

2

3

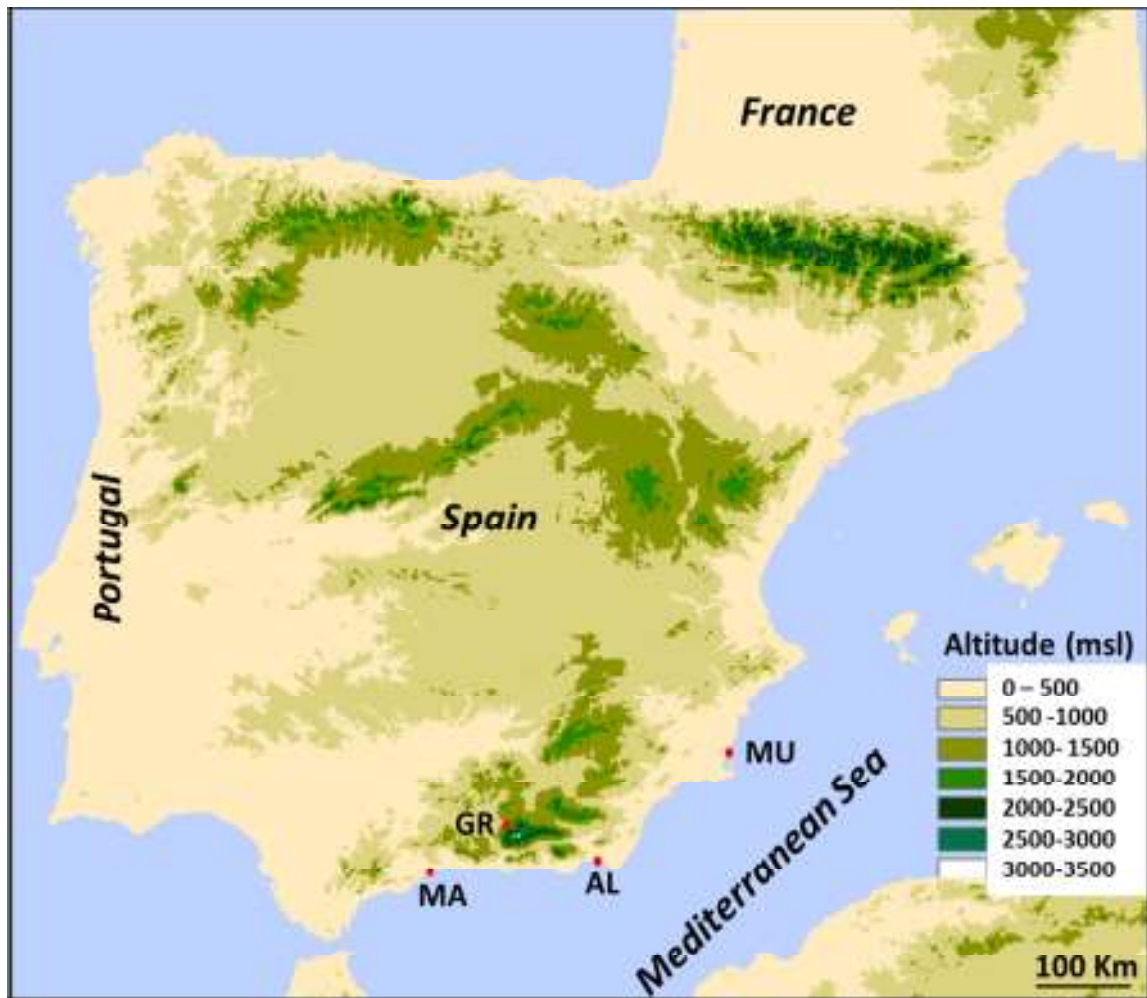

4

5 Figure S1. First order stations of the Spanish official meteorological network (AEMET)  
6 in SE Spain: AL=Almeria; GR=Granada; MA=Malaga; MU=Murcia (San Javier).

7

8

9

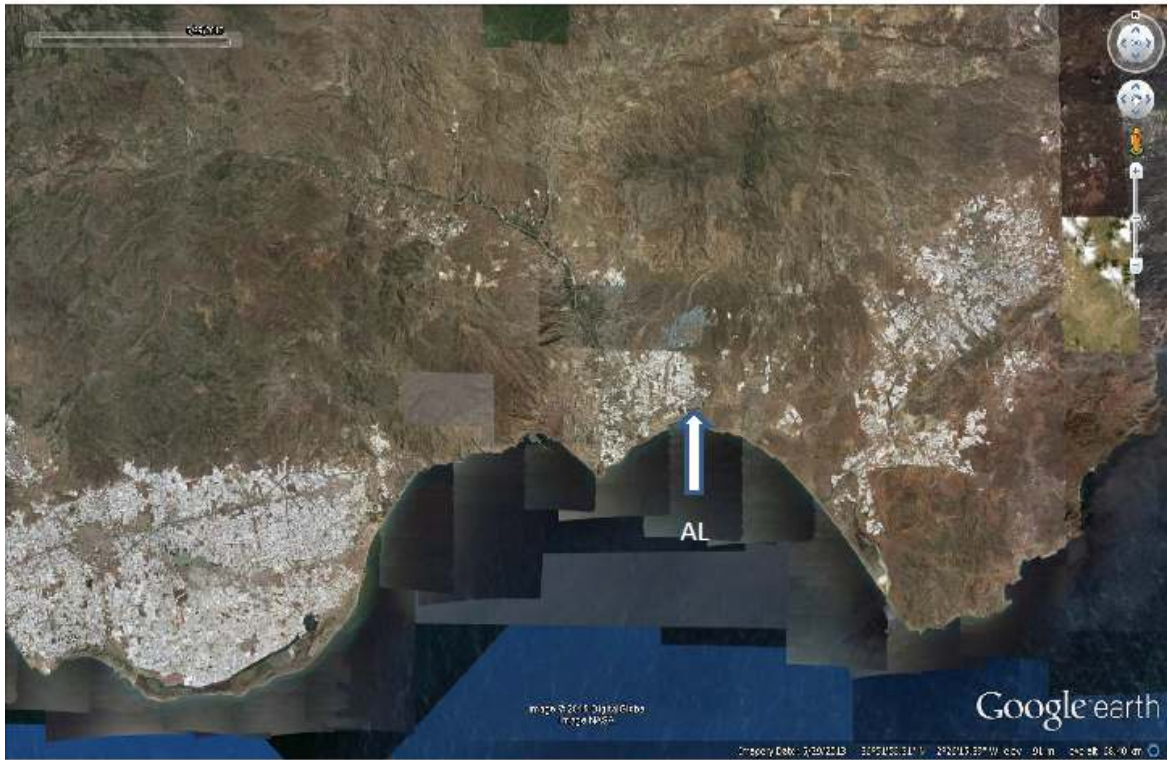

1  
2 Figure S2. Satellite picture of high albedo greenhouses (in white) next to AEMET  
3 Almeria (AL) meteorological station, located at Almeria International airport. 2013  
4 picture taken from 75 km altitude.

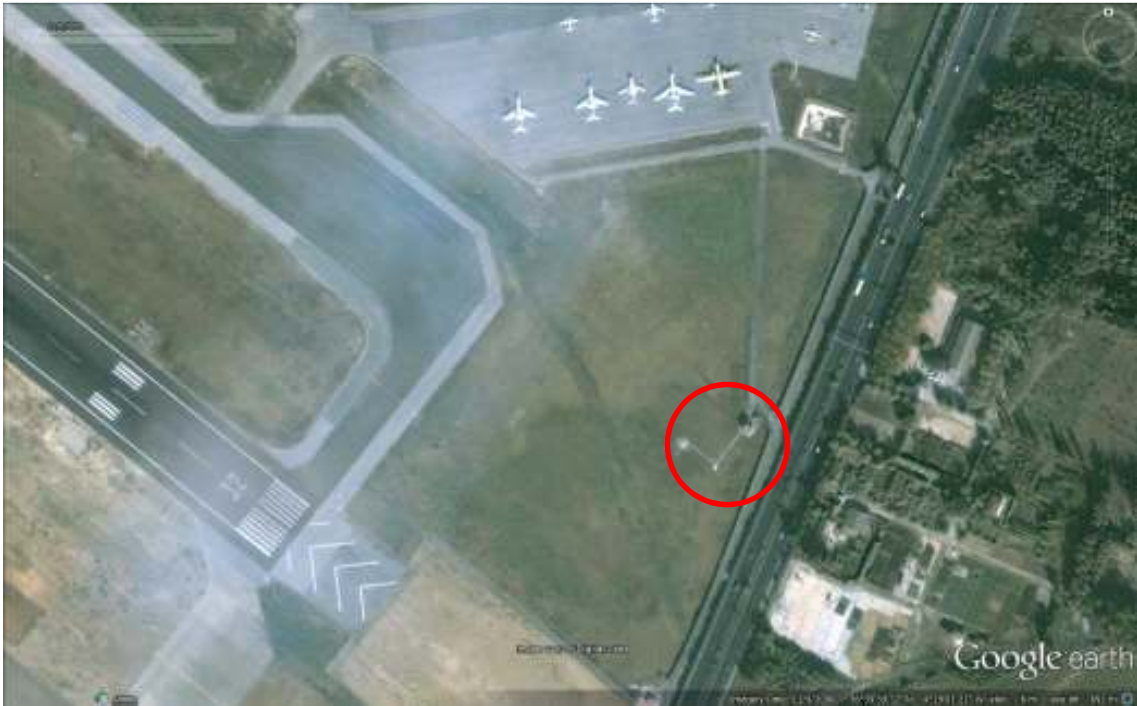

1

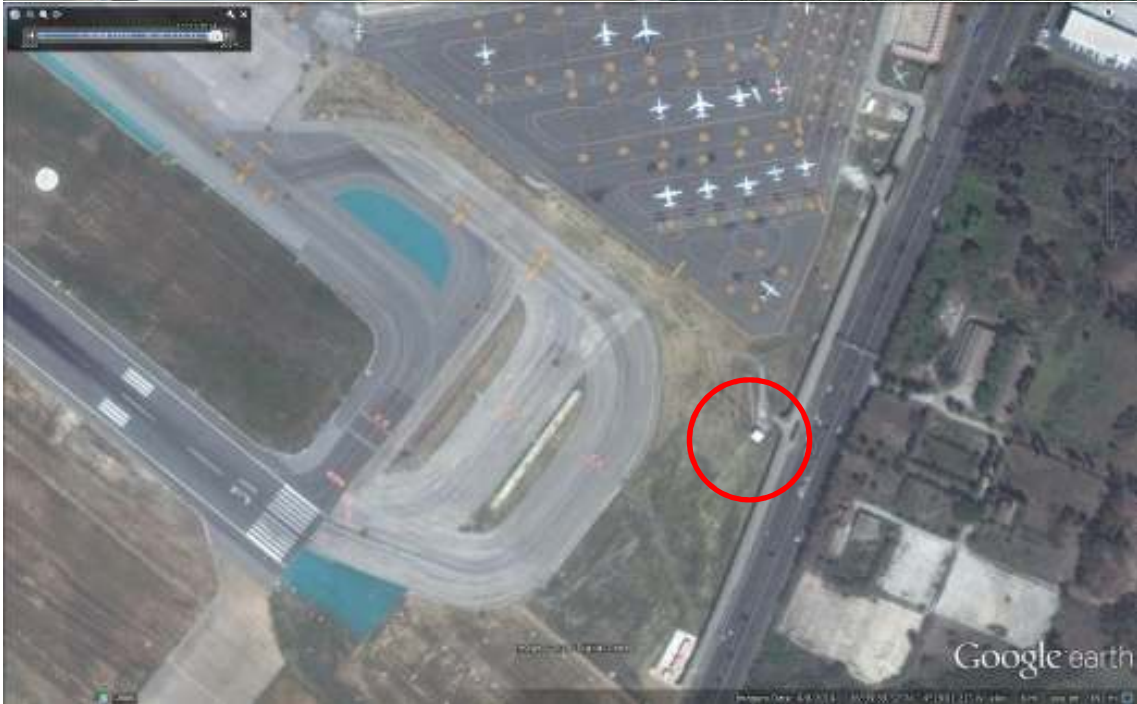

2

3

4

5

6

Figure S3. Recent land cover and airport traffic changes around the Malaga airport meteorological station (MA) (red circle) by the development of a new terminal and new taxiways. Up: 11/9/2000; Down: 4/8/2014.

1 Table S1. Uncertainty analysis of piecewise regression fit of annual mean ( $T_{\text{mean}}$ ).  
 2 Slopes of regression segments in  $^{\circ}\text{C year}^{-1}$ .

3  
 4

| Data    | Parameter  | Estimate | Std error | C.I.            | T value | p-value  |
|---------|------------|----------|-----------|-----------------|---------|----------|
| ALMERÍA | Breakpoint | 1989     | 2.625     | (1983.7,1994.3) | -4.392  | 8.34e-05 |
|         | Slope 1    | 0.076    | 0.0121    | (0.051,0.10)    | 6.219   | 2.57e-07 |
|         | Slope 2    | -0.0074  | 0.007     | (-0.015,0.014)  | -0.1165 | 0.9079   |
| GRANADA | Breakpoint | 1997     | 5.86      | (1985.2,2008.8) | -2.079  | 0.0442   |
|         | Slope 1    | 0.055    | 0.0103    | (0.034,0.076)   | 5.366   | 3.92e-06 |
|         | Slope 2    | -0.0034  | 0.0268    | (-0.057,0.051)  | -0.126  | 0.9006   |
| MURCIA  | Breakpoint | 1982     | 2.787     | (1976.4,1987.6) | -3.045  | 0.0041   |
|         | Slope 1    | 0.128    | 0.02919   | (0.069,0.187)   | 4.385   | 8.52e-05 |
|         | Slope 2    | 0.0272   | 0.0065    | (0.014,0.040)   | 4.201   | 0.0001   |
| MÁLAGA  | Breakpoint | 2013     | 0.5781    | (2011.8,2014.2) | 1.756   | 0.087    |
|         | Slope 1    | 0.0441   | 0.0043    | (0.035,0.053)   | 10.140  | 1.72e-12 |
|         | Slope 2    | 0.6505   | 0.3443    | (-0.045,1.346)  | 1.889   | 0.0663   |

5

1 Table S2. Uncertainty analysis of piecewise regression fit of annual average maximum  
 2 temperature series ( $T_{\max}$ ). Slopes of regression segments in  $^{\circ}\text{C year}^{-1}$   
 3

4

| Data    | Parameter  | Estimate | Std error | C.I.              | T value | p-value  |
|---------|------------|----------|-----------|-------------------|---------|----------|
| ALMERÍA | Breakpoint | 1987     | 1.701     | (1983.6,1990.4)   | -6.365  | 1.61e-07 |
|         | Slope 1    | 0.1084   | 0.0166    | (0.075,0.142)     | 6.517   | 9.93e-08 |
|         | Slope 2    | -0.0316  | 0.0077    | (-0.047,-0.016)   | -4.1157 | 0.0002   |
| GRANADA | Breakpoint | 2013     | 0.4974    | (2012,2014)       | 2.538   | 0.0153   |
|         | Slope 1    | 0.0288   | 0.0084    | (0.012,0.046)     | 3.428   | 0.0014   |
|         | Slope 2    | 1.7222   | 0.6651    | (0.379,3.066)     | 2.589   | 0.0134   |
| MURCIA  | Breakpoint | 1983     | 3.56      | (1975.81,1990.19) | -2.770  | 0.0085   |
|         | Slope 1    | 0.0821   | 0.0206    | (0.040,0.124)     | 3.984   | 0.0003   |
|         | Slope 2    | 0.0157   | 0.0054    | (0.005,0.027)     | 2.9     | 0.0061   |

5

1 Table S3. Uncertainty analysis of piecewise regression fit of annual average minimum  
 2 temperature series ( $T_{\min}$ ). Slopes of regression segments in  $^{\circ}\text{C year}^{-1}$   
 3

| Data    | Parameter  | Estimate | Std error | C.I.              | T value | p-value  |
|---------|------------|----------|-----------|-------------------|---------|----------|
| ALMERÍA | Breakpoint | 1998     | 5.646     | (1986.6,2009.4)   | -2.131  | 0.0395   |
|         | Slope 1    | 0.0578   | 0.0082    | (0.041,0.074)     | 7.056   | 1.8e-08  |
|         | Slope 2    | 0.0156   | 0.0138    | (-0.012,0.044)    | 1.128   | 0.2663   |
| GRANADA | Breakpoint | 1997     | 4.533     | (1987.84,2006.16) | -2.630  | 0.0122   |
|         | Slope 1    | 0.0626   | 0.0137    | (0.035,0.090)     | 4.556   | 5.03e-05 |
|         | Slope 2    | -0.0184  | 0.0206    | (-0.060,0.023)    | -0.894  | 0.3766   |
| MURCIA  | Breakpoint | 1981     | 2.475     | (1976,1986)       | -2.969  | 0.0051   |
|         | Slope 1    | 0.1921   | 0.0691    | (0.053,0.332)     | 2.782   | 0.0083   |
|         | Slope 2    | 0.0384   | 0.0087    | (0.021,0.056)     | 4.423   | 7.59e-05 |
| MÁLAGA  | Breakpoint | 1977     | 5.31      | (1966.27,1987.73) | -0.862  | 0.394    |
|         | Slope 1    | 0.1257   | 0.0788    | (-0.033,0.285)    | 1.595   | 0.1187   |
|         | Slope 2    | 0.0557   | 0.0054    | (0.045,0.067)     | 10.25   | 1.26e-12 |

4

5

1 Table S4. Uncertainty analysis of piecewise regression fit of difference temperature  
 2 series (DTR). Slopes of regression segments in °C year<sup>-1</sup>

3

| Data    | Parameter  | Estimate | Std error | C.I.            | T value | p-value   |
|---------|------------|----------|-----------|-----------------|---------|-----------|
| ALMERÍA | Breakpoint | 1982     | 1.3       | (1979.4,1984.6) | -6.353  | 1.67e-07  |
|         | Slope 1    | 0.1306   | 0.0267    | (0.077,0.185)   | 4.899   | 1.723e-05 |
|         | Slope 2    | -0.0614  | 0.0059    | (-0.073,-0.049) | -10.374 | 8.967e-13 |
| GRANADA | Breakpoint | 2011     | 1,155     | (2008.7,2013.3) | 3.189   | 0.0028    |
|         | Slope 1    | -0.0094  | 0.0088    | (-0.027,0.008)  | -1.068  | 0.2922    |
|         | Slope 2    | 0.5962   | 0.1864    | (0.22,0.973)    | 3.199   | 0.0027    |
| MURCIA  | Breakpoint | 1981     | 4.111     | (1972.7,1989.3) | 1.965   | 0.0565    |
|         | Slope 1    | -0.1012  | 0.0371    | (-0.176,-0.026) | -2.724  | 0.0096    |
|         | Slope 2    | -0.0204  | 0.0069    | (-0.034,-0.006) | -2.961  | 0.0052    |
| MÁLAGA  | Breakpoint | 2012     | 1.589     | (2008.8,2015.2) | 1.759   | 0.0865    |
|         | Slope 1    | -0.0279  | 0.0043    | (-0.037,-0.019) | -6.546  | 9.06e-08  |
|         | Slope 2    | 0.2413   | 0.1516    | (-0.065,0.548)  | 1.591   | 0.1196    |

4

5

6
